# Supplementary material
Source: PubMed Central journal article supplement (PMC5407935)
Supplement: NIHMS856843-supplement-Graphic_Abstract.pdf [file NIHMS856843-supplement-Graphic_Abstract.pdf]

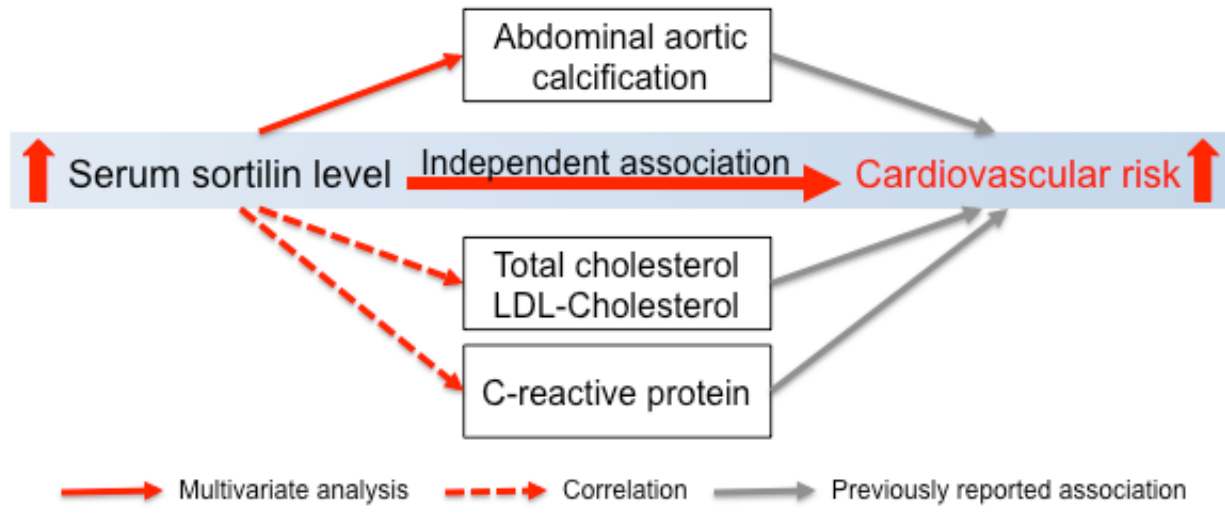

**Graphical abstract:** High serum sortilin associates with severe abdominal aortic calcification. Serum sortilin correlates with total and LDL-cholesterol levels and CRP. High serum sortilin associates with increased cardiovascular risk independently of aortic calcification, cholesterol levels and C-reactive protein.
